# Supplementary material for: Enhanced current rectification and self-powered photoresponse in multilayer p-MoTe2/n-MoS2 van der Waals heterojunctions
Source: Royal Society of Chemistry journal article supplement (doi:10.1039/c7nr03445h), 2017-01-01
Supplement: c7nr03445h1.pdf [file c7nr03445h1.pdf]

## Supporting Information

Enhanced current rectification and self-powered photoresponse in  
multilayer p-MoTe<sub>2</sub>/n-MoS<sub>2</sub> van der Waals heterojunctions

*Bin Wang,<sup>a</sup> Shengxue Yang,<sup>\*a</sup> Cong Wang,<sup>b</sup> Minghui Wu,<sup>c</sup> Li Huang,<sup>c</sup>  
Qian Liu,<sup>\*b</sup> Chengbao Jiang<sup>\*a</sup>*

<sup>a</sup> School of Materials Science and Engineering, Beihang University,  
Beijing 100191, P.R. China

Email: [sxyang@buaa.edu.cn](mailto:sxyang@buaa.edu.cn); [jiangcb@buaa.edu.cn](mailto:jiangcb@buaa.edu.cn)

<sup>b</sup> National Center for Nanoscience and Technology, No. 11 Beiyitiao,  
Zhongguancun, Beijing 100190, P.R. China

Email: [liuq@nanoctr.cn](mailto:liuq@nanoctr.cn)

<sup>c</sup> Department of Physics, South University of Science and Technology of  
China, Shenzhen 518005, P.R. China

## **Experimental section:**

**Device Fabrication.** The multilayer MoTe<sub>2</sub>/MoS<sub>2</sub> heterojunctions were fabricated by the dry transfer method. Firstly, both multilayer MoS<sub>2</sub> and MoTe<sub>2</sub> flakes were exfoliated by micromechanical cleavage approach from bulk MoS<sub>2</sub> and MoTe<sub>2</sub> crystals and transferred onto two separate pieces of Si substrates coating with 300 nm-thick SiO<sub>2</sub> layer. And then, the polymethyl methacrylate (PMMA) solution was spin-coated onto the substrate with MoS<sub>2</sub> multilayer, using rotating speed of 3000 rpm/s. After annealing at 180 °C for 10 minutes, the PMMA-coated substrate was immersed in 5 M NaOH solution at 60 °C and PMMA would be floating with multilayer MoS<sub>2</sub> subsequently. After that, the PMMA/MoS<sub>2</sub> film was transferred onto another substrate with MoTe<sub>2</sub> multilayer to superimpose them together, by adjusting the position of flakes under the microscope. Finally, the entire substrate was soaked with acetone to remove the PMMA, leaving the MoTe<sub>2</sub>/MoS<sub>2</sub> heterojunctions on the substrate.

The FETs of MoTe<sub>2</sub>/MoS<sub>2</sub> heterojunctions were fabricated using electron-beam lithography (Raith150). Then 20-nm-thick Ni layer followed by 50-nm-thick Au layer was deposited to fabricate contact metal electrodes by electron beam evaporation (EB700-I) and they were lift-off in acetone.

**Characterizations and measurements.** The TEM images were

obtained using a JEM-2100F at an acceleration voltage of 200 KV. The selected area electron diffraction (SAED) patterns were also collected by the TEM setup. The Raman measurements were performed by Raman spectrometer (Renishaw Model inVia-Reflex) with the excitation of He–Ne laser (532 nm). Samples were further characterized by Atomic force microscope (ICON) to confirm the thickness of layers. Electrical and optoelectronic behaviors were measured using a semiconductor parameter analyzer and shielded probe station.

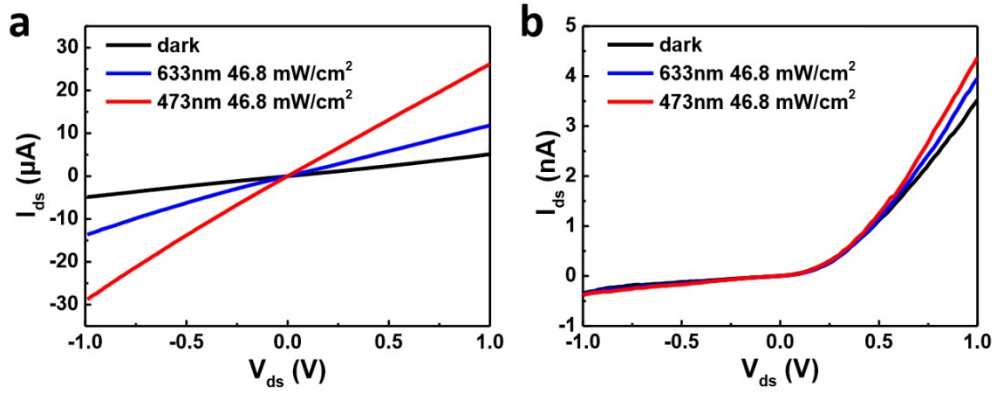

Fig. S1.  $I_{ds}$  -  $V_{ds}$  characteristics of the individual (a) MoS<sub>2</sub> flakes and (b) MoTe<sub>2</sub> flakes under dark and different laser radiation.

For MoS<sub>2</sub>, the linear  $I_{ds}$  -  $V_{ds}$  curves indicate that the contact between MoS<sub>2</sub> and Ni/Au electrodes are well ohmic. And  $I_{ds}$  increases under light illumination, with on/off ratio of 2.32 and 5.14 at laser wavelength of 633 nm and 473 nm, respectively. For MoTe<sub>2</sub>, the nonlinear  $I_{ds}$ - $V_{ds}$  characteristics suggest that Schottky contacts are formed between the Ni/Au metal pads and MoTe<sub>2</sub>, with a current on/off ratio of  $\sim 10$ . Under illumination, the increase rate of  $I_{ds}$  is smaller than that of individual MoS<sub>2</sub>.

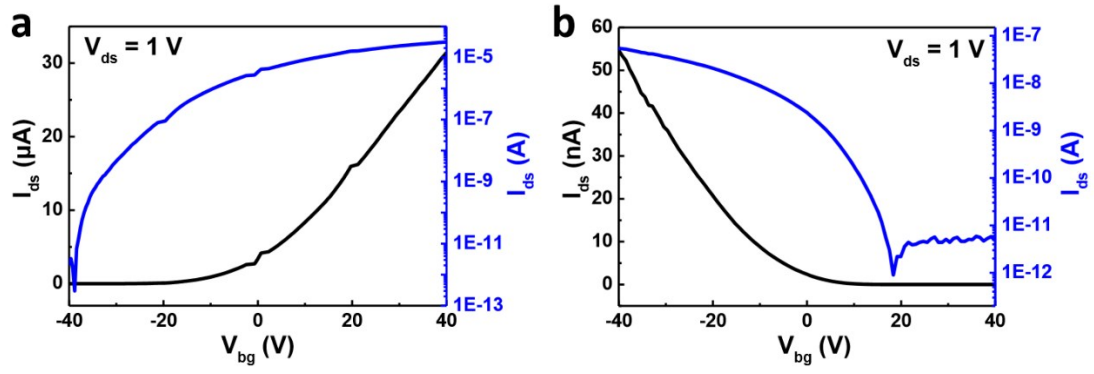

Fig. S2. Transfer characteristics of individual (a) MoS<sub>2</sub> flakes ( $V_{ds} = 1$  V) and (b) MoTe<sub>2</sub> flakes ( $V_{ds} = 1$  V).

For MoS<sub>2</sub>,  $I_{ds}$  increases with increasing of  $V_{bg}$ , indicating that MoS<sub>2</sub> flakes possess obvious n-type behavior. On the contrary, MoTe<sub>2</sub> flakes show p-type behavior, since  $I_{ds}$  decreases with increase of  $V_{bg}$ .

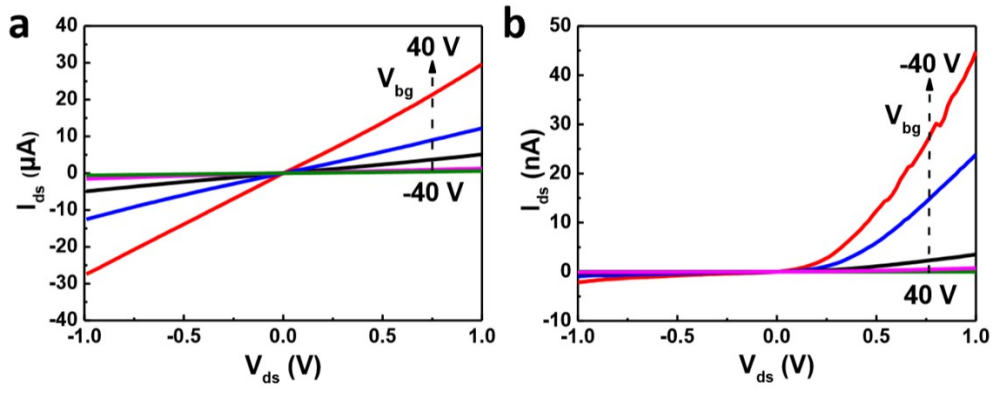

Fig. S3. Output characteristics of the individual (a) MoS<sub>2</sub> flakes and (b) MoTe<sub>2</sub> flakes ( $V_{bg} = -40 \sim 40$  V).
